# Supplementary material
Source: PubMed Central journal article supplement (PMC4901458)
Supplement: rstb20150264supp1.pdf [file rstb20150264supp1.pdf]

## Supplementary material

Figure S1

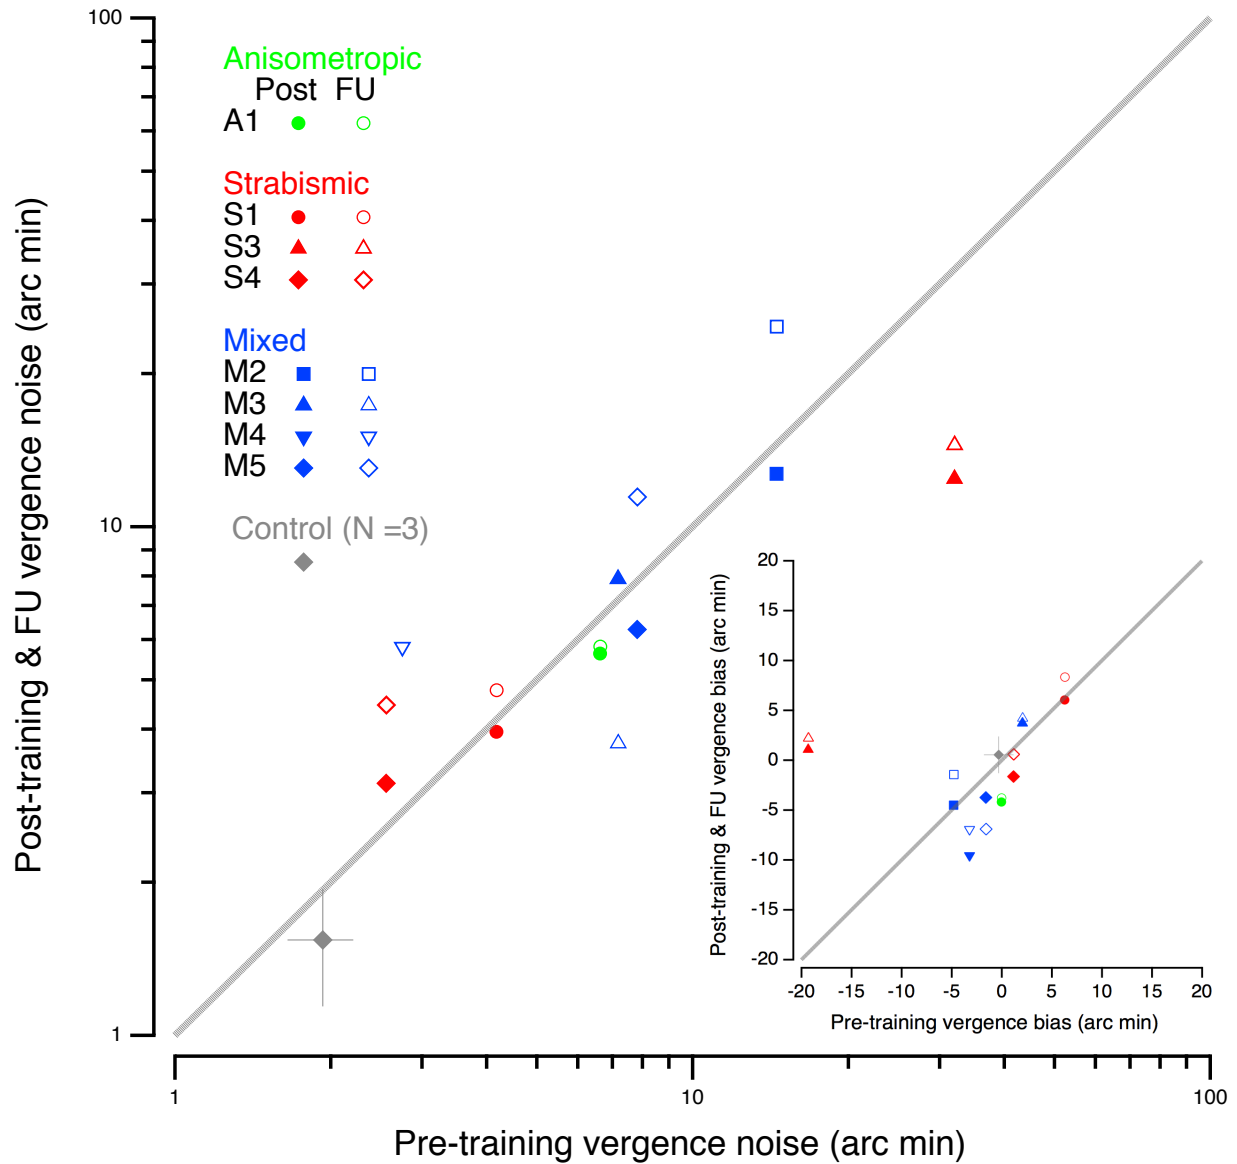

Figure S1. Pre vs. Post-training (solid symbols) and Follow Up (open symbols) vergence noise. Each colored symbol shows the data of a single stereoblind or stereodeficient observer. The gray diamond shows the mean pre/post data of 3 normal control observers. The inset show pre, post and Follow-up vergence bias. One subject (S3) showed a reduction in vergence bias following training.
